# Supplementary material for: Stem quality assessment in European National Forest Inventories: an opportunity for harmonised reporting?
Source: Springer Nature journal article supplement (doi:10.1007/s13595-015-0503-8), 2015-07-30
Supplement: MOESM1 [file 13595_2015_503_MOESM1_ESM.doc]

**Online Resource 1: Questionnaire on stem quality assessment in European NFIs.**

**Field assessment of stem quality attributes**

1. Which of the listed parameters that may be useful or are currently used for stem quality assessment are recorded in your NFI during field data collection?

The following attributes related to stem quality assessment were available for selection: tree status (dead or alive), tree dbh, tree height, stem damage source (abiotic and biotic damage), kind of stem damage (forking, tree break, curvature, splitting due to frost, splitting due to lightening, rottening – stem cavity, presence of fruiting body, staining or discolouration on bark), branching, base of crown (living and dead), straightness, crown projection or diameter, artificial removal of branches, upper diameter, bark thickness, stem taper.

1. At what domain are the parameters recorded in your NFI ?

The following domains were available for selection: forest, other wooded land, trees outside forest, and forest available for wood supply – FAWS).

1. At what level are the parameters recorded in your NFI?

The third question included tree or plot level and if tree level whether the assessment was done for a sub-sample of trees or for all measured trees in the inventory plot.

1. Is stem quality assessed in your NFI?
2. State the reason why stem quality is not assessed in your NFI.
3. Do you have plans to assess stem quality in future?

**Stem quality classification in the field**

1. Is there a stem quality classification system based on visual assessment in the field in your NFI?

The fourth question was intended to obtain information whether the NFI uses some classification system and how many classes it includes. In addition, the question whether the NFI assessed the current status of the tree or its potential (when the tree reaches stem production stage) was also asked.

1. On what portion of the tree is timber quality assessed in the field?

The following answers were selected and allowed to choose by NFI representatives: a) on whole tree, b) up to a specified height, c) up to e specified height according to stem volume proportion, d) up to a specified top diameter, and other.

1. Which parameters are taking into consideration when stem quality is classified visually in the field?

The same parameters as in the first question were selected. However, in this case, the parameters did not have to be directly recorded in the field database. The field workers just take them into consideration when visually assessing the stem quality.

**Timber assortments generation**

1. Are assortments generated in your NFI results?

The final products of the forest management are assortments. Visual stem quality assessment only helps in quantifying the assortment structure of the tree and the stand on the inventory plot.

1. Are the visually assessed stem quality classes used to model (generate) assortments?

This question directly follows the previous one and asks NFI representative whether the stem quality assessment in the field is then used to generate assortments. Several variants might occur: a) NFI only assess the stem quality and does not generate the assortments, b) NFI directly uses the stem quality assessment (classification) to generate the assortments, c) NFI does not use stem quality classification but generate assortments using other parameters or models.

1. On what portion of the tree are assortments generated?

The same question as the fifth one, but related to the assortments and not to stem quality classification.

1. What is the basis/origin of the models that are used to generate assortments

The following sources were selected: NFI data, national data (national studies), models from other countries, and other.

1. Which parameters are used to generate assortments?

The same parameters as for the question 1 and 6 were identified and from which the NFI representatives could make a selection.

1. Do the assortment models vary for species?
