# Supplementary material for: Stem quality assessment in European National Forest Inventories: an opportunity for harmonised reporting?
Source: Springer Nature journal article supplement (doi:10.1007/s13595-015-0503-8), 2015-07-30
Supplement: MOESM2 [file 13595_2015_503_MOESM2_ESM.doc]

# Online Resource 2: Example of assortment structure of Lithuanian forests resulting from NFI (2008-2012)

| Forest type | Assortment categories | | | | | | | | | Branches | Dead trees |
| --- | --- | --- | --- | --- | --- | --- | --- | --- | --- | --- | --- |
| Size of industrial wood, cm | | | | Fuel wood over bark | Total merchan-table | Felling residues | Logging losses | Total |
| >25 | 13.6-25 | 6-13.5 | Total |
| Wood volume, % from stem volume | | | | | | | | | | |
| Total | 31 | 35 | 9 | 76 | 8 | 84 | 14 | 2 | 100 | 16 | 4 |
| From them in state forests | 30 | 36 | 9 | 76 | 8 | 84 | 12 | 2 | 100 | 16 | 4 |
