# Supplementary material for: Stem quality assessment in European National Forest Inventories: an opportunity for harmonised reporting?
Source: Springer Nature journal article supplement (doi:10.1007/s13595-015-0503-8), 2015-07-30
Supplement: MOESM3 [file 13595_2015_503_MOESM3_ESM.doc]

**Online Resource 3: Examples of approaches in stem quality assessment in European NFIs**

*Czech Republic*

On Czech NFI sample plots (permanent design, two concentric circles) wood quality is assessed on sample trees selected out of all registered trees (stems, tally trees) by basal area factor (BAF) 12. On each (living and standing) sample tree belonging to one of the following species - Norway spruce (*Picea alba*), Scots pine (*Pinus silvestris*), European beech (*Fagus sylvatica*), Durmast oak (*Quercus petraea*) and Pendulate oak (*Quercus robur*), European larch (*Larix decidua*) and Common birch (*Betula pendula*) a quality of stem basis is assessed. Four categories (A, B, C, D) in decreasing expectations of wood quality are used. Assignment to these categories is done using relatively strict but easy to check criteria - observations assessed between the ground and the height of five meters. Category A means that there are no visible signs of any wood defects and minimum dimensions are met, so that valuable assortments are expected (veneer, sporting equipment etc.). Quality B means that either dimensions or some visible wood defects exclude (at least) the basal part of the stem from valuable assortments but criteria for common saw-log quality are still met. Category C means that there are defects excluding parts or the whole basal section (up to 5 m) from saw-log quality. Category D is defined by dimensions only, which – if not met, do not usually allow sectioning into other but pulpwood or firewood logs. Assignment to these categories does not necessarily mean that a corresponding assortment class (A – veneer logs, B saw logs) would be produced by sectioning. However, there is only a little chance for better than the reference quality.

Apart of this categorical assessment and common dendrometric dimensions (diameter in breast height, total tree height) there are also two additional measurements related to quality – height of pulpwood defect and height of saw log quality. Height of pulpwood defect is defined as the first occurrence of a defect which excludes given part of stem from saw log quality. Height of saw log quality is a height above which occurrence of saw logs is not expected.

Estimation of true shares of the three main wood qualities (veneer or better, saw logs, pulpwood or firewood) will be based on the above variables and a biometric model parametrized using several hundreds of sample trees per each of the species. These were analyzed in standing condition and after felling and sectioning between 2008 and 2010 (a special survey outside NFI sample plots). For further details see field-survey instructions of the Czech NFI2 project (Adolt et al. 2013).

References:

Adolt, R, Kučera, M., Zapadlo, J. Andrlík, M., Čech, Z. Coufal, J. 2013: Pracovní postupy pozemního šetření NIL2. Tech. report [Field manual for 2nd NFI. Technical Report]. Ústav pro hospodářskou úpravu lesů Brandýs nad Labem. ISBN: 978-80-905423-2-7

*Slovak Republic*

Slovakia’s National Forest Inventory directly implemented the assessment of stem quality and assortments (Šmelko et al. 2006; 2008). In the Slovakia, tree-level and stand-level models exist to estimate the proportion of quality classes of undamaged and damaged standing trees(Petráš and Nociar, 1990; 1991a; 1991b; Mecko et al. 1993; 1994; Petráš et al. 1995; Petráš and Mecko 1995; Petráš et al. 2008). The models were built up using a large empirical dataset for the main tree species (Norway spruce, silver fir, Scots pine, oak species, European beech, larch, hornbeam, birch and poplar clones) using regression modelling.

In the field, the stem quality of each tree was assessed. The actual status of mature stands was evaluated as an actual status, while in the younger stands the potential status of the tree was assessed regardless of the dimension (dbh, height). In this context potential refers to the particular quality class a tree is expected to reach at maturity. Each tree was classified into one of the three classes: A (healthy, straight, untwisted, centric, with no shape deformations), B (slightly twisted, with smaller technical defects, thin or medium-sized branches or knots are allowed), C (with great technical defects, large-sized branches, twisted, crooked). These quality classes in combination with tree dimension (dbh) were then used for partitioning the volume of each tree (volume under bark, but also over bark) into the quality and assortment classes using the regression models (1) and (2).

*Finland*

Wood quality was assessed for tally (registered and marked) trees, with a more detailed assessment for sample trees. For each tally tree, a tree class was recorded describing an overall quality. The tree classes were:

A) Living trees – 0. small tree (dbh less than 4.5 cm), 1. waste tree (larger than 4.5 cm but the stem cannot be used for timber or pulp because of defects such as decay, fork, sweep), 2.-4. trees smaller than timber size (pulp wood quality), 5.-8. Timber sized trees;

B) Dead trees – a. merchantable standing dead tree, b. merchantable fallen dead tree, c. dry, hard dead tree, d. non-merchantable dead tree.

For sample trees (every 7th tally tree) the quality was described by dividing the stem vertically into quality classes and recording the length and reason for each module. The quality classes were: 1. Saw log quality without branches or with very small branches;

2. Saw log quality with fresh branches;

3. Saw log quality with dry branches;

4. Pulp wood quality;

5. Pulp wood quality between two saw log quality parts (deciduous trees only);

6. Waste wood, not even pulp wood quality;

7. Saw log quality in a forked tree;

8. Complementary cut point (usually due to sweeping).

Growing stock by timber assortments (timber, pulp, waste) was estimated for national statistics. Estimations are done first for the sample trees using measured dimension (dbh, upper diameter at 6 m height, and tree height), length of quality parts, taper curve model and bucking algorithm. Volumes by timber assortments are generalised for the tally trees with non-parametric estimation, and finally summed up for calculation strata.

*Romania*

The wood quality is assessed in the Romanian NFI for sample trees belonging to sample plots located on Forest and Other Wooded Land categories.

There are four tree quality classes (I, II, III and IV) according to the proportion of the wood volume able to be used as industrial wood from the total volume of a tree. For example, in the first quality class are registered healthy trees with straight, no defect and no damaged stems.

In the field, each NFI sample tree is assessed visually in relation to its defects or damages and it is registered in one of the four quality classes. A resinous tree, for example, is registered in the first quality class (I) if the ratio of the tree stem height able to be used as industrial wood and the total height of the tree is more than 0.60. For a broadleaved tree, this proportion must be more than 0.50. For a fourth quality class (IV) tree, the proportion must be less than 0.10 for both resinous and broadleaved trees.

For assortment assessment, specific tables elaborated for 46 tree species, detail the percent of different dimensional wood assortments from the total industrial wood volume (Giurgiu et al. 2004). Classification of the dimensional wood assortments is made according to the diameter at the smallest end of the log. There are three dimensional wood assortments classes: thick dimension wood class (with three sub-classes), medium dimension wood class (with two sub-classes) and thin dimension wood (pulp wood and fuel wood).

In the case of valuable tree species (spruce, beech, oak, cherry, maple), there are also specific tables for the assessment of timber volume for valuable industrial utilization (veneer, resonance wood, sawn wood), but only for large trees. For example, a spruce tree could have resonance wood assortments only if the diameter is at least of 40 cm.

References

Giurgiu V, Decei I, Draghiciu, V (2004) Metode si tabele dendrometrice, Editura Ceres, Bucuresti.

*Lithuania*

Wood quality was assessed during field data collection in NFI sample plots. For each sample tree, the tree stem quality was recorded. All trees were subdivided into living, dead and felled categories. Concerning living trees, different classes were used for trees up to an age of 20 years and for older ones. Trees up to 20 years in age were divided into two quality classes:

I class trees – are viable, dominant and sub dominant, evenly distributed in the forest, future trees with straight, not damaged stems; and II class trees - are suppressed, unviable long-term, with damage, two leaders, skewed stems or allocated in dense tree groups.

Trees older than 20 years were classified into two groups: merchantable trees and fuel wood trees. Trees were classified into the first group, if they are higher than 20 m and their lower part of stem (not shorter than 4 m in length) can be used for commercial assortments or trees smaller than 20 m in height if one fifth of all tree length may be used for industrial assortments. Living branches are allowed for commercial assortments; but dead branches over 5 cm in diameter are not allowed for coniferous and dead branches over 7 cm for broadleaved. Also various types and sizes of stem rots are not allowed. Curvature up to 2 % is allowed for commercial assortments of coniferous trees, and up to 3 %for broadleaved. All living trees which do not meet above-mentioned requirements are classified as fuel wood.

Dead trees, except for the most recently fallen or broken trees, are classified as fuel wood trees or non-merchantable trees. Stems lying on the ground for more than 3 years, standing dead trees thinner than 20 cm which died more than 5 years ago (found dead during the last measurement) and more or standing dead trees larger than 20 cm in dbh which died more than 10 years ago (found dead during the last measurement) and more are usually considered to be unsuitable for fire wood.

Growing stock by timber assortments: industrial wood of three diameter (measured at the smaller end of log) classes (large - over 25 cm, medium - 13.6 -25 cm and small - less than 13.6 cm), fuel wood and felling residues are estimated from the NFI for the purpose of national statistics (Online Resource 2). Wood with a diameter (measured at the smaller end of log) over 25 cm is usually used for sawn wood and veneer production, less than 13.6 cm – for pulpwood. Wood of intermediate size (13.6-25 cm) is used for sawn wood production as well as for pulpwood and panels.
